# Supplementary material for: Effect of leisure-time physical activity on blood pressure in people with hypertension: a systematic review and meta-analysis
Source: PubMed Central journal article supplement (PMC10313796; doi:10.1038/s41598-023-37149-2), 2023-06-30
Supplement: 41598_2023_37149_MOESM1_ESM.pdf [file 41598_2023_37149_MOESM1_ESM.pdf]

## **Effect of Leisure-Time Physical Activity on Blood Pressure in Patients with Hypertension: A Systematic Review and Meta-Analysis**

**Authors:** Md Shariful Islam<sup>1</sup>, Ammatul Fardousi<sup>2</sup>, Monaemul Islam Sizar<sup>3,4</sup>, Md. Golam Rabbani<sup>5</sup>, Rubana Islam<sup>6</sup>, K.M. Saif-Ur-Rahman<sup>2\*</sup>

### **Affiliation:**

1. Infectious Diseases Division, icddr,b, Dhaka, Bangladesh
2. Health System and Population Studies Division, icddr,b, Dhaka, Bangladesh
3. Health System for Tuberculosis, Dhaka, Bangladesh
4. Public Health Foundation, Bangladesh, Dhaka, Bangladesh
5. Health Economics Unit, Health Services Division, Ministry of Health and Family Welfare, Dhaka, Bangladesh
6. Freelance researcher, Dhaka, Bangladesh

**Corresponding Author:** KM Saif-Ur-Rahman

Associate Scientist

Health Systems and Population Studies Division, icddr,b, Dhaka,  
Bangladesh

Email: [su.rahman@icddr.org](mailto:su.rahman@icddr.org)

## Appendix: Details of search strategies

We searched six databases on 8 September 2021.

We updated the search on 14 February 2023.

### PubMed/Medline

| Search Number | Search terms                                                                                                                                                                                                                                                                                                                                                                                                                                                                                                                                                                                                                                                                                                                                                                                                                                                                                                                                                                                                                                                                                                                                                                                                                                                                                                                                                                                                                                                                                     |
|---------------|--------------------------------------------------------------------------------------------------------------------------------------------------------------------------------------------------------------------------------------------------------------------------------------------------------------------------------------------------------------------------------------------------------------------------------------------------------------------------------------------------------------------------------------------------------------------------------------------------------------------------------------------------------------------------------------------------------------------------------------------------------------------------------------------------------------------------------------------------------------------------------------------------------------------------------------------------------------------------------------------------------------------------------------------------------------------------------------------------------------------------------------------------------------------------------------------------------------------------------------------------------------------------------------------------------------------------------------------------------------------------------------------------------------------------------------------------------------------------------------------------|
| #1            | “Leisure time”[tiab] OR “playtime”[tiab] OR “recreation*”[tiab] OR “holiday”[tiab] OR “breaktime”[tiab] OR “free time”[tiab] OR “spare time”[tiab]                                                                                                                                                                                                                                                                                                                                                                                                                                                                                                                                                                                                                                                                                                                                                                                                                                                                                                                                                                                                                                                                                                                                                                                                                                                                                                                                               |
| #2            | Exercise[Mesh] OR exercise[tiab] OR “physical activ*”[tiab] OR sports[Mesh] OR sports[tiab] OR "Leisure Activities"[Mesh] OR “leisure activ*” [tiab] OR walking[Mesh] OR walking[tiab] OR running[Mesh] OR running[tiab] OR jogging[Mesh] OR jogging[tiab] OR baseball[Mesh] OR baseball[tiab] OR basketball[Mesh] OR basketball[tiab] OR bicycling[Mesh] OR bicycling[tiab] OR Boxing [Mesh] OR Boxing [tiab] OR "Cricket Sport"[Mesh] OR cricket[tiab] OR Dancing[Mesh] OR Dancing[tiab] OR football[Mesh] OR football[tiab] OR golf[Mesh] OR golf[tiab] OR Gardening[Mesh] OR Gardening[tiab] OR gymnastics[Mesh] OR gymnastics[tiab] OR mountaineering[Mesh] OR mountaineering[tiab] OR hockey[Mesh] OR hockey[tiab] OR "Martial Arts"[Mesh] OR "Martial Arts"[tiab] OR swimming[Mesh] OR swimming[tiab] OR volleyball[Mesh] OR volleyball[tiab] OR soccer[Mesh] OR soccer[tiab] OR “Water Sports”[Mesh] OR “Water Sports”[tiab] OR wrestling[Mesh] OR wrestling[tiab] OR “weight lifting”[Mesh] OR “weight lifting”[tiab] OR “track and field”[Mesh] OR “track and field”[tiab] OR skiing[Mesh] OR skiing[tiab] OR skating[Mesh] OR skating[tiab] OR “Snow Sports”[Mesh] OR “Snow Sports”[tiab] OR “Racquet Sports”[Mesh] OR “Racquet Sports”[tiab] OR tennis[Mesh] OR tennis[tiab] OR “physical fitness”[Mesh] OR “physical fitness” [tiab] OR “athletic performance”[Mesh] OR “athletic performance” [tiab] OR "Youth Sports"[Mesh] OR "Youth Sports"[tiab] OR “exercise training” [tiab] |

|           |                                                                                                                                                                                                                                                                                                                                                                                                                                                                                                                                                                                                                                                                            |
|-----------|----------------------------------------------------------------------------------------------------------------------------------------------------------------------------------------------------------------------------------------------------------------------------------------------------------------------------------------------------------------------------------------------------------------------------------------------------------------------------------------------------------------------------------------------------------------------------------------------------------------------------------------------------------------------------|
| <b>#3</b> | <p>“Hypertension”[Majr] OR “Hypertension/rehabilitation”[Majr] OR<br/> “Hypertension/therapy”[Majr] OR Hypertension[tiab] OR “Blood Pressure” [Mesh] OR<br/> “Blood Pressure/classification”[Mesh] OR “Blood Pressure/complications”[Mesh] OR “Blood<br/> Pressure/diagnosis”[Mesh] OR “high blood pressure” [tiab] OR “Blood pressure” [tiab] OR<br/> blood pressure [tiab] OR “Blood Pressure/metabolism”[Mesh] OR “Blood Pressure/statistics<br/> and numerical data”[Mesh] OR “Blood Pressure/therapy”[Mesh] OR “high blood pressure”<br/> [tiab] OR “Blood pressure” [tiab] OR ((arterial OR diastolic OR systolic) AND pressure) OR<br/> “Blood Pressure” [tiab]</p> |
| <b>#4</b> | #1 AND #2 AND #3                                                                                                                                                                                                                                                                                                                                                                                                                                                                                                                                                                                                                                                           |

**Embase**

| Search<br>Number | Search terms                                                                                                                                                                                                                                                                                                                                                                                                                                                                                                                                                                                                                                                                                                                                                      |
|------------------|-------------------------------------------------------------------------------------------------------------------------------------------------------------------------------------------------------------------------------------------------------------------------------------------------------------------------------------------------------------------------------------------------------------------------------------------------------------------------------------------------------------------------------------------------------------------------------------------------------------------------------------------------------------------------------------------------------------------------------------------------------------------|
| <b>#1</b>        | <p>‘Leisure time’/exp OR ‘playtime’/exp OR ‘recreation’/exp OR ‘holiday’/exp OR<br/> ‘breaktime’/exp OR ‘free time’/exp OR ‘spare time’/exp</p>                                                                                                                                                                                                                                                                                                                                                                                                                                                                                                                                                                                                                   |
| <b>#2</b>        | <p>‘exercise’/exp OR ‘physical activ*/exp OR ‘sports’/exp OR ‘leisure activities’/exp OR<br/> ‘walking’/exp OR ‘running’/exp OR ‘jogging’/exp OR ‘baseball’/exp OR ‘basketball’/exp OR<br/> ‘bicycling’/exp OR ‘boxing’/exp OR ‘Cricket Sport’/exp OR ‘dancing’/exp OR ‘football’/exp<br/> OR ‘golf’/exp OR ‘gardening’/exp OR ‘gymnastics’/exp OR ‘mountaineering’/exp OR<br/> ‘hockey’/exp OR ‘Martial Arts’/exp OR ‘swimming’/exp OR ‘volleyball’/exp OR ‘soccer’/exp<br/> OR ‘water sports’/exp OR ‘wrestling’/exp OR ‘weight lifting’/exp OR ‘track and field’/exp OR<br/> ‘skiing’/exp OR ‘skating’/exp OR ‘Snow Sports’/exp OR ‘Racquet Sports’/exp OR<br/> ‘tennis’/exp OR ‘physical fitness’/exp OR ‘athletic performance’/exp OR ‘Youth Sports’/exp</p> |

|    |                                                                                                                                                                                     |
|----|-------------------------------------------------------------------------------------------------------------------------------------------------------------------------------------|
| #3 | 'hypertension'/exp OR 'blood pressure'/exp OR 'high blood pressure'/exp OR<br>'bloodpressure'/exp OR 'arterial pressure'/exp OR 'diastolic pressure'/exp OR 'systolic pressure'/exp |
| #4 | #1 AND #2 AND #3                                                                                                                                                                    |

**Web of Science**

| Search Number | Search terms                                                                                                                                                                                                                                                                                                                                                                                                                                                                                                           |
|---------------|------------------------------------------------------------------------------------------------------------------------------------------------------------------------------------------------------------------------------------------------------------------------------------------------------------------------------------------------------------------------------------------------------------------------------------------------------------------------------------------------------------------------|
| #1            | TS= ("Leisure time" OR "playtime" OR "recreation*" OR "holiday" OR "break time" OR "free time" OR "spare time")                                                                                                                                                                                                                                                                                                                                                                                                        |
| #2            | TS= (exercise OR "physical activ*" OR sports OR "leisure activ*" OR walk* OR running OR jogging OR baseball OR basketball OR bicycling OR Boxing OR cricket OR Dancing OR football OR golf OR Gardening OR gymnastics OR mountaineering OR hockey OR "Martial Arts" OR swimming OR volleyball OR soccer OR "Water Sports" OR wrestling OR "weight lifting" OR "track and field" OR skiing OR skating OR "Snow Sports" OR "Racquet Sports" OR tennis OR "physical fitness" OR "athletic performance" OR "Youth Sports") |
| #3            | TS= (Hypertension OR "Blood Pressure" OR "high blood pressure" OR "arterial pressure" OR "diastolic pressure" OR "systolic pressure")                                                                                                                                                                                                                                                                                                                                                                                  |
| #4            | #1 AND #2 AND #3                                                                                                                                                                                                                                                                                                                                                                                                                                                                                                       |

**Scopus**

| Search Number | Search terms                                                                                                              |
|---------------|---------------------------------------------------------------------------------------------------------------------------|
| #1            | TITLE-ABS-KEY ("Leisure time" OR "playtime" OR "recreation*" OR "holiday" OR "break time" OR "free time" OR "spare time") |

|           |                                                                                                                                                                                                                                                                                                                                                                                                                                                                                                                                  |
|-----------|----------------------------------------------------------------------------------------------------------------------------------------------------------------------------------------------------------------------------------------------------------------------------------------------------------------------------------------------------------------------------------------------------------------------------------------------------------------------------------------------------------------------------------|
| <b>#2</b> | TITLE-ABS-KEY (exercise OR "physical activ*" OR sports OR "leisure activ*" OR walk* OR running OR jogging OR baseball OR basketball OR bicycling OR Boxing OR cricket OR Dancing OR football OR golf OR Gardening OR gymnastics OR mountaineering OR hockey OR "Martial Arts" OR swimming OR volleyball OR soccer OR "Water Sports" OR wrestling OR "weight lifting" OR "track and field" OR skiing OR skating OR "Snow Sports" OR "Racquet Sports" OR tennis OR "physical fitness" OR "athletic performance" OR "Youth Sports") |
| <b>#3</b> | TITLE-ABS-KEY (Hypertension OR "Blood Pressure" OR "high blood pressure" OR "arterial pressure" OR "diastolic pressure" OR "systolic pressure")                                                                                                                                                                                                                                                                                                                                                                                  |
| <b>#4</b> | #1 AND #2 AND #3                                                                                                                                                                                                                                                                                                                                                                                                                                                                                                                 |

**CENTRAL (The Cochrane Library)**

| Search Number | Search terms                                                                                                                                                                                                                                                                                                                                                                                                                                                                                                       |
|---------------|--------------------------------------------------------------------------------------------------------------------------------------------------------------------------------------------------------------------------------------------------------------------------------------------------------------------------------------------------------------------------------------------------------------------------------------------------------------------------------------------------------------------|
| <b>#1</b>     | ("Leisure time" OR "playtime" OR "recreation*" OR "holiday" OR "break time" OR "free time" OR "spare time")                                                                                                                                                                                                                                                                                                                                                                                                        |
| <b>#2</b>     | (exercise OR "physical activ*" OR sports OR "leisure activ*" OR walk* OR running OR jogging OR baseball OR basketball OR bicycling OR Boxing OR cricket OR Dancing OR football OR golf OR Gardening OR gymnastics OR mountaineering OR hockey OR "Martial Arts" OR swimming OR volleyball OR soccer OR "Water Sports" OR wrestling OR "weight lifting" OR "track and field" OR skiing OR skating OR "Snow Sports" OR "Racquet Sports" OR tennis OR "physical fitness" OR "athletic performance" OR "Youth Sports") |

|           |                                                                                                                                   |
|-----------|-----------------------------------------------------------------------------------------------------------------------------------|
| <b>#3</b> | (Hypertension OR "Blood Pressure" OR "high blood pressure" OR "arterial pressure" OR "diastolic pressure" OR "systolic pressure") |
| <b>#4</b> | #1 AND #2 AND #3                                                                                                                  |

### Physical Education Index (ProQuest)

| Search Number | Search terms                                                                                                                                                                                                                                                                                                                                                                                                                                                                                                       |
|---------------|--------------------------------------------------------------------------------------------------------------------------------------------------------------------------------------------------------------------------------------------------------------------------------------------------------------------------------------------------------------------------------------------------------------------------------------------------------------------------------------------------------------------|
| <b>#1</b>     | ("Leisure time" OR "playtime" OR "recreation*" OR "holiday" OR "break time" OR "free time" OR "spare time")                                                                                                                                                                                                                                                                                                                                                                                                        |
| <b>#2</b>     | (exercise OR "physical activ*" OR sports OR "leisure activ*" OR walk* OR running OR jogging OR baseball OR basketball OR bicycling OR Boxing OR cricket OR Dancing OR football OR golf OR Gardening OR gymnastics OR mountaineering OR hockey OR "Martial Arts" OR swimming OR volleyball OR soccer OR "Water Sports" OR wrestling OR "weight lifting" OR "track and field" OR skiing OR skating OR "Snow Sports" OR "Racquet Sports" OR tennis OR "physical fitness" OR "athletic performance" OR "Youth Sports") |
| <b>#3</b>     | (Hypertension OR "Blood Pressure" OR "high blood pressure" OR "arterial pressure" OR "diastolic pressure" OR "systolic pressure")                                                                                                                                                                                                                                                                                                                                                                                  |
| <b>#4</b>     | #1 AND #2 AND #3                                                                                                                                                                                                                                                                                                                                                                                                                                                                                                   |

## **Appendix: Study selection criteria**

### **Study settings**

We selected studies that were conducted in community settings. We excluded studies that were performed in hospitals or healthcare facilities.

### **Type of studies**

We included both interventional and observational studies published in the English Language. Any reviews, systematic reviews, reviews of reviews, or trial protocols were not included. Books, chapters, remarks, viewpoints, editorials, letters, correspondences, conference proceedings, and opinions were also excluded. We excluded studies published before 2000. We also excluded pre-prints. We included only studies published in the English language.

### **Type of participants**

We selected studies with hypertensive participants aged 18 and over. We followed American guidelines (minimum SBP 130 and DBP 80 mm Hg) to define a participant as a hypertensive respondent. The participants with high blood pressure, whether controlled or uncontrolled, were included. Nationality, residency (urban or rural), sex, ethnicity, religion, area, and socioeconomic position of study participants were not used to exclude studies.

### **Type of interventions**

Any physical activity interventions conducted in leisure time were included. Only findings reporting the effect of leisure-time physical activity were included if any research was undertaken to test the effect of overall physical activity on lowering blood pressure. The studies were discarded if the findings of leisure-time physical activity were not stated separately. Interventions conducted to prevent hypertension were excluded.

### **Comparators**

The comparison was non-exercise performing controls.

### **Outcome measures**

The primary outcomes were systolic blood pressure (SBP) and diastolic blood pressure (DBP) as continuous data. The blood pressure must be measured by any standard device (electronic or traditional mercury sphygmomanometer) in millimeters of mercury (mmHg). The secondary outcome was heart rate (beat per min).

## **Appendix: More details about the included articles**

### **Funding Sources**

The majority of studies (n=9) did not mention the funding sources of their studies. Six studies were funded by the government,<sup>2,6,7,10-12</sup> and one was funded by a charitable foundation.<sup>5</sup>

### **Adverse events**

Out of the 14 interventional studies, only three trials reported information about adverse events.<sup>5-7</sup> Of the three reported studies, one study,<sup>5</sup> Cheung et al. (2005), reported an adverse event (A woman in the qigong group experienced vestibular neuritis).

### **Adherence**

Adherence was measured in three out of the 14 included interventional studies. The reported adherence rates to the intervention were 100% in Shakoor et al. (2020),<sup>13</sup> 83.3% in Sulaeman et al. (2020),<sup>8</sup> and 78% in Wolff et al. (2016).<sup>7</sup>

### **Excluded studies**

The main reasons to exclude studies were not including only hypertensive participants, not having blood pressure as an outcome, and not focusing on leisure-time physical activities. Details have been shared in appendix p. 8.



## Appendix: Reasons for excluding articles

| Articles               | Reason for exclusion                                    |
|------------------------|---------------------------------------------------------|
| Al-Hamdan et al. 2012  | Not on hypertensive population only                     |
| Amigo 1997             | Published before 2000                                   |
| Aminian et al. 2021    | Not on hypertensive population only                     |
| Andrews et al. 1982    | Review article                                          |
| Araiza 2006            | Not on hypertensive population only                     |
| Archillaa et al. 2021  | Not in the English language                             |
| Arija 2017             | Not on hypertensive population only                     |
| Aro 1984               | Not on hypertensive population only                     |
| Baker et al. 2008      | Not on hypertensive population only                     |
| Baross et al. 2017     | Normotensive population                                 |
| Bayat et al. 2018      | Normotensive population                                 |
| Blom et al. 2011       | Not on hypertensive population only                     |
| Blom et al. 2012       | Not on leisure-time physical activity                   |
| Borhani 1996           | Conference paper                                        |
| Brandon et al. 2006    | Not on hypertensive population only                     |
| Brown et al. 2014      | Not on hypertensive population only                     |
| Bueno et al. 2016      | The outcome variable was not controlling blood pressure |
| Byambasukh et al. 2018 | Not on hypertensive population only                     |
| Byambasukh et al. 2019 | Not on hypertensive population only                     |
| Byambasukh et al. 2020 | Not on hypertensive population only                     |
| Casson et al. 2003     | Not on leisure-time physical activity                   |
| Cederholm et al. 1986  | Not on hypertensive population only                     |

| Articles              | Reason for exclusion                                    |
|-----------------------|---------------------------------------------------------|
| Chaudhary et al. 1988 | Published before 2000                                   |
| Clays et al. 2012     | Not on hypertensive population only                     |
| Crowley et al. 2021   | Not measured association between Bp and LTPA            |
| Delfino et al. 2020   | Not on leisure-time physical activity                   |
| Dureja et al 2014     | Not on hypertensive population only                     |
| Edimo et al. 2023     | Not on hypertensive population only                     |
| Edla et al. 2016      | Not on leisure-time physical activity                   |
| Elley et al. 2003     | The outcome variable was not controlling blood pressure |
| Elmer et al. 1995     | Not on leisure-time physical activity                   |
| Foulds et al. 2014    | Normotensive population                                 |
| Fritz et al. 2013     | Not on hypertensive population only                     |
| Fuchs et al. 1993     | Conference paper                                        |
| Gallagher et al. 2021 | Outcome variable not blood pressure                     |
| Gilson et al. 2007    | Not on hypertensive population only                     |
| Ginsberg et al. 1990  | Published before 2000                                   |
| Gradidge et al. 2018  | Not on hypertensive population only                     |
| Gupta 2019            | Not on hypertensive population only                     |
| Haas et al. 2015      | Not on hypertensive population only                     |
| Headley et al. 2017   | Not on hypertensive population only                     |
| Hermart et al. 1994   | Not on hypertensive population only                     |
| Herzig et al. 2014    | Not on hypertensive population only                     |
| Isaacs et al. 2007    | Not on hypertensive population only                     |
| Islam et al. 2021     | Not on leisure-time physical activity                   |
| Islam et al. 2021 (2) | Not Leisure-time physical activity                      |

| <b>Articles</b>        | <b>Reason for exclusion</b>                             |
|------------------------|---------------------------------------------------------|
| Joseph et al. 2019     | The outcome variable was not controlling blood pressure |
| Kastarinen et al. 2007 | Not on hypertensive population only                     |
| Klesges et al. 1991    | Not on hypertensive population only                     |
| Kibria et al. 2022     | Outcome variable not blood pressure                     |
| Koh et al. 2010        | Not on hypertensive population only                     |
| Koh et al. 2010        | Not on hypertensive population only                     |
| Kríz et al. 1971       | Not in the English language                             |
| Kríz et al. 1971       | Not in the English language                             |
| Kurban et al. 2011     | Not on hypertensive population only                     |
| Lawton et al. 2008     | Not on hypertensive population only                     |
| Lee et al. 2011        | Not on hypertensive population only                     |
| Li et al. 2021         | Not on hypertensive population only                     |
| LIU 2001               | The outcome variable was not controlling blood pressure |
| Liu et al. 2022        | Not on hypertensive population only                     |
| Lowensteyn et al. 2016 | Poster presentation                                     |
| Miles et al. 2013      | Not on hypertensive population only                     |
| Millett et al. 2013    | Not on leisure-time physical activity                   |
| Milon et al. 1986      | Not on hypertensive population only                     |
| Mozos et al. 2015      | Not on hypertensive population only                     |
| Murphy et al. 2006     | Normotensive population                                 |
| Nemoto et al. 2007     | Normotensive population                                 |
| Palatini 2012          | Review article                                          |
| Pandey et al. 2017     | Poster presentation                                     |
| Pecelj-Gec et al. 1990 | Not in the English language; excluded                   |

| Articles                     | Reason for exclusion                  |
|------------------------------|---------------------------------------|
| Penco et al. 2006            | Review article                        |
| Pescatello et al. 2004       | Review article                        |
| Petal 1975                   | Published before 2000                 |
| Petal 1975                   | Published before 2000                 |
| Petal 1975                   | Published before 2000                 |
| Pitanga et al. 2010          | Not on hypertensive population only   |
| Premila 2017                 | Not on leisure-time physical activity |
| Pressman et al. 2009         | Not on hypertensive population only   |
| Rasmussen et al. 2018        | Not on hypertensive population only   |
| Reaven et al. 1991           | Not on hypertensive population only   |
| Ribeiro Junior 2020          | Not on hypertensive population only   |
| Richter-Heinrich et al. 1980 | Not in the English language           |
| Riegel et al. 2019           | Not on hypertensive population only   |
| Riemenschneider et al. 2020  | Not on hypertensive population only   |
| Saensak et al. 2013          | Not on leisure-time physical activity |
| Sakuragi et al. 2006         | Normotensive population               |
| Sarma 2015                   | Not on hypertensive population only   |
| Sousa et al. 2013            | Conference paper                      |
| Stoltzfus et al. 2020        | Normotensive population               |
| Su et al. 2021               | Not on hypertensive population only   |
| Takata et al. 2010           | Not on hypertensive population only   |
| Treff et al. 2017            | Not on hypertensive population only   |
| Tsao et al. 2022             | Not on hypertensive population only   |
| Tudor-Locke et al 2004       | Not on hypertensive population only   |

| Articles            | Reason for exclusion                         |
|---------------------|----------------------------------------------|
| Vriz et al. 2022    | Not on hypertensive population only          |
| Wang et al. 2021    | Not on hypertensive population only          |
| Werneck et al. 2021 | Not on hypertensive population only          |
| Werneck et al. 2018 | Not on hypertensive population only          |
| Yao et al. 2017     | Supplementary publication. Authors contacted |
| Zubir et al. 2022   | Not on hypertensive population only          |

## **Appendix: Risk of bias assessment using JBI critical appraisal tools**

### *Randomised controlled trials*

Random sequence generation and allocation and concealment of treatment were used in 67% (n=8/12) trials, while they were unclear in the rest of the four RCTs.<sup>1-4</sup> Treatment groups were similar at the baseline in 92% (n=11/12) of the trials. Due to the nature of interventions, it was difficult to maintain blinding in both participants and personnel delivering treatment. We judged it as not applicable in those cases. Only two studies maintained blinding of treatment to participants.<sup>5,6</sup> We found that 92% (n=11/12) of trials did not share adequate information on blindness treatment assignment with outcome assessors. One study maintained blinding of treatment assignment to outcome assessors.<sup>7</sup> In all the trials, treatment groups were treated the same other than the intervention of interest. We assessed 'complete follow up' as yes in 5/12 studies, no in 4/12, and unclear in 3/12 studies. Participants were analysed in the groups to which they were randomised in 83% (n=10/12) of the trials, and for the two crossover trials, we judged it as not applicable. We measured 'outcomes in an identical way for treatment groups' as yes in 83% (n=10/12) and unclear in 17% (n=2/12) of the RCTs. 'Outcomes measured reliably' were judged as yes in 83% (n=10/12) and unclear in 17% (n=2/12) of RCTs. A total of 92% (n=11/12) of trials used appropriate statistical analysis, while we found one study did not provide adequate information about this. The trial design was appropriate for all the RCTs.

### *Other studies*

'Cause and effect' were clear in both quasi-experimental studies. Both studies had similar comparison groups. However, participants included in the comparison groups receiving similar treatment were unclear in both studies. Sulaeman et al (2020)<sup>8</sup> had a control group, whereas Nóbrega et al (2013)<sup>9</sup> did not. Sulaeman et al. (2020)<sup>8</sup> did not perform multiple measurements of the outcome both pre-and post-intervention/exposure, while we assessed it for Nóbrega et al. (2013)<sup>9</sup> as not applicable. Follow-up was completed by Nóbrega et al. (2013)<sup>9</sup>; however, it was unclear by Sulaeman et al. (2020)<sup>8</sup>. Outcomes were measured in the same way in both studies, while outcomes measured reliably were unclear in Sulaeman et al. (2020)<sup>8</sup>. We judged that Nóbrega et al. (2013)<sup>9</sup> used appropriate statistical analysis, while Sulaeman et al. (2020)<sup>8</sup> did not.

### A. Randomized control trial (n=12)

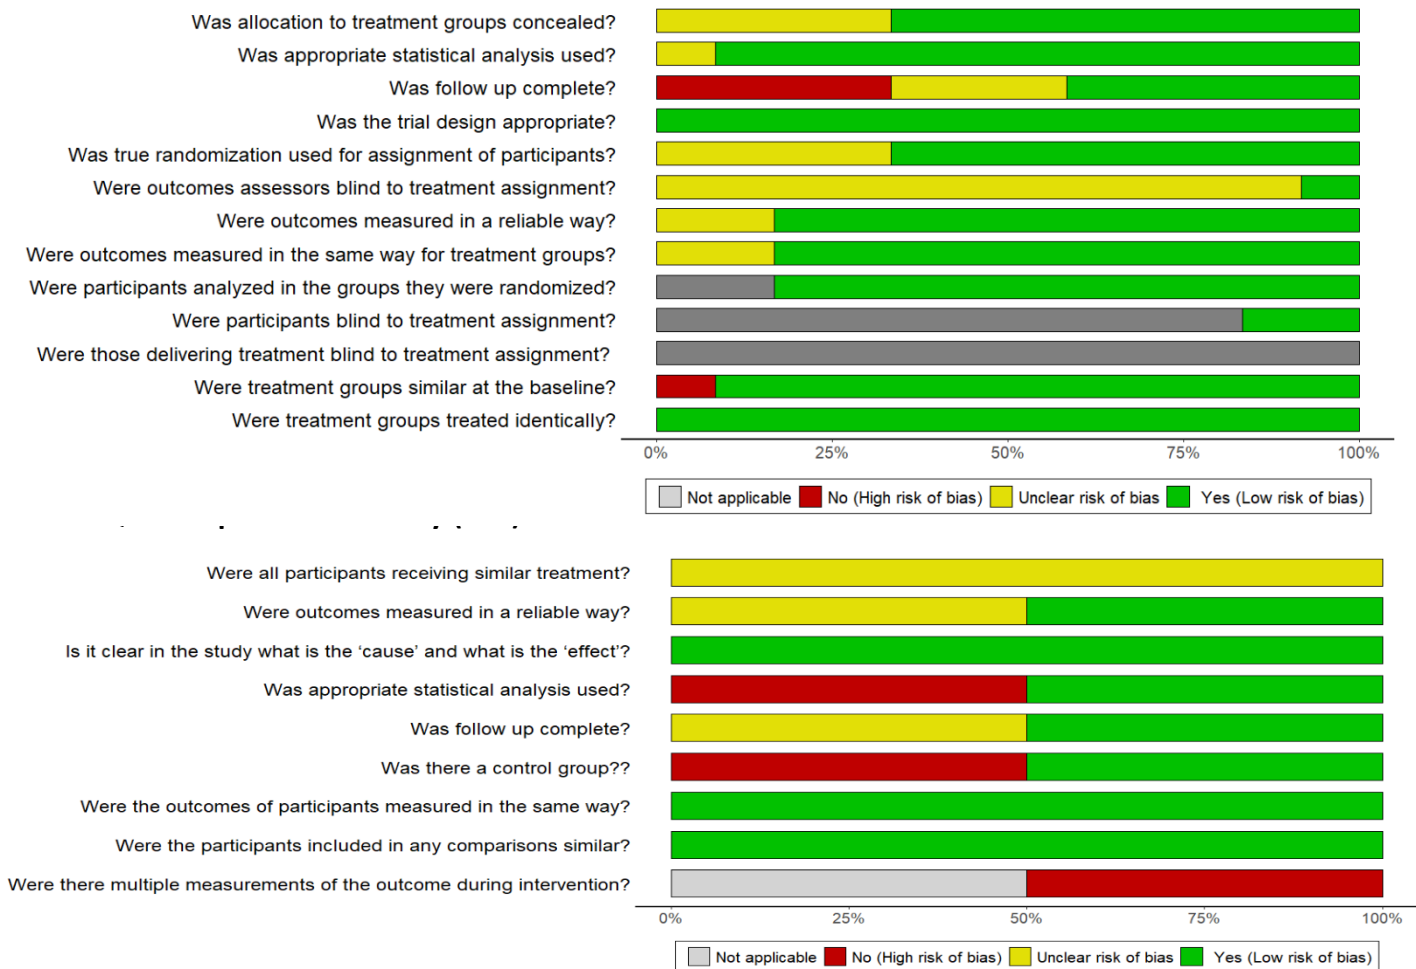

### C. Cross-sectional study (n=3)

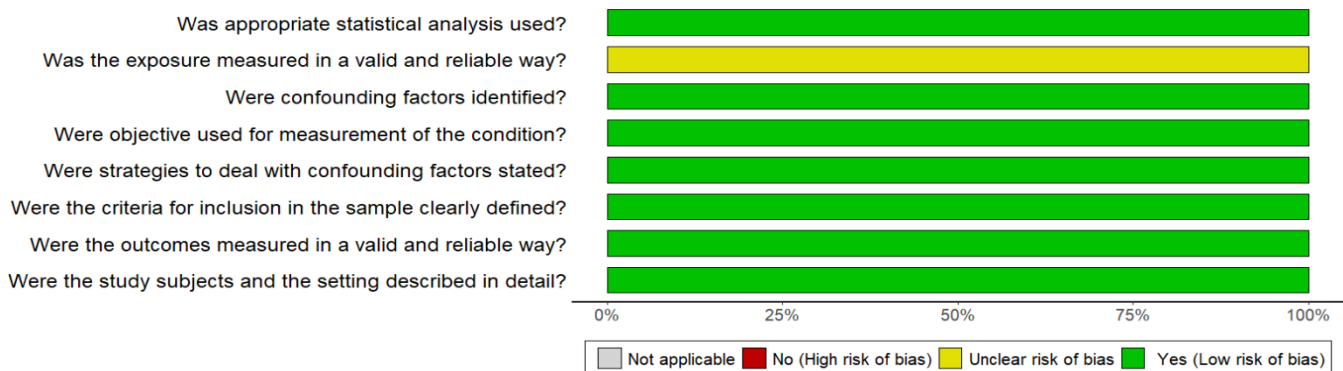

## Appendix: Funnel plot with Egger's test for publication bias

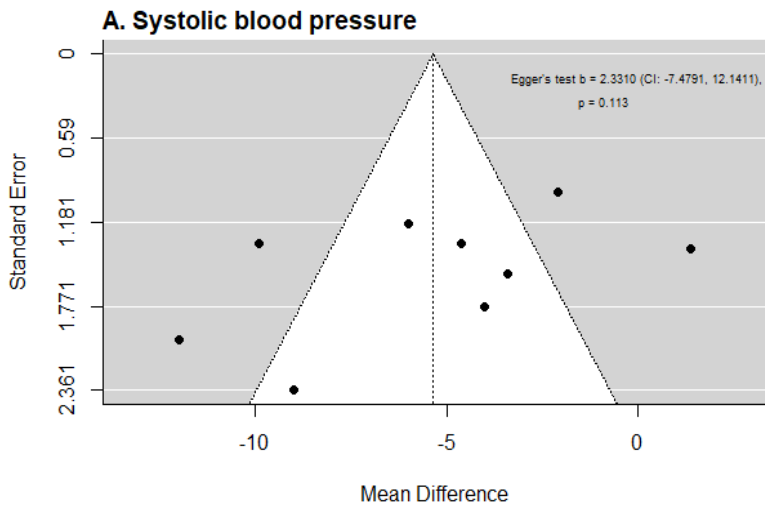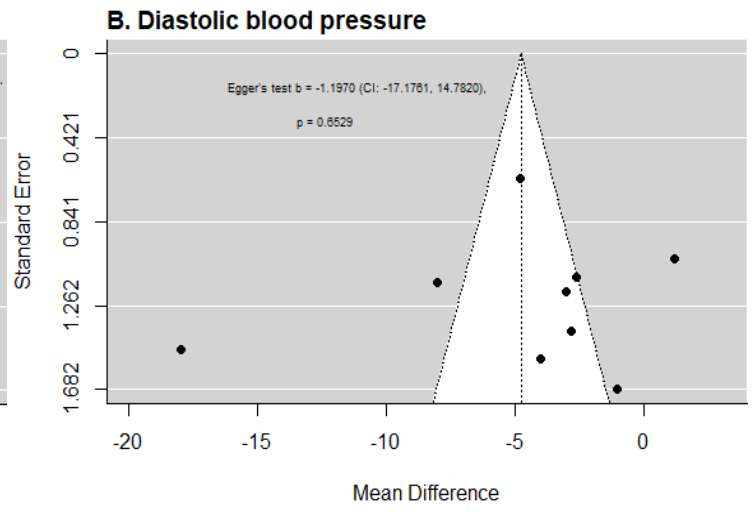



**Appendix: Risk of bias score domain of randomized controlled trials measured using JBI critical appraisal tool**

| Authors & year               | 1. Was true randomization used for assignment of participants to treatment groups? | 2. Was allocation to treatment groups concealed? | 3. Were treatment groups similar at the baseline? | 4. Were participants blind to treatment assignment? | 5. Were those delivering treatment blind to treatment assignment? | 6. Were outcomes assessors blind to treatment assignment? | 7. Were treatment groups treated identically other than the intervention of interest? | 8. Was follow up complete and if nt, were differences between groups in terms of their follow up adequately described and analyzed? | 9. Were participants analyzed in the groups to which they were randomized? | 10. Were outcomes measured in the same way for treatment groups? | 11. Were outcomes measured in a reliable way? | 12. Was appropriate statistical analysis used? | 13. Was the trial design appropriate, and any deviations from the standard RCT design (individual randomization, parallel groups) accounted for in the conduct and analysis of the trial? | Score (13) |
|------------------------------|------------------------------------------------------------------------------------|--------------------------------------------------|---------------------------------------------------|-----------------------------------------------------|-------------------------------------------------------------------|-----------------------------------------------------------|---------------------------------------------------------------------------------------|-------------------------------------------------------------------------------------------------------------------------------------|----------------------------------------------------------------------------|------------------------------------------------------------------|-----------------------------------------------|------------------------------------------------|-------------------------------------------------------------------------------------------------------------------------------------------------------------------------------------------|------------|
| <b>Carpes et al (2021)</b>   | Yes                                                                                | Yes                                              | Yes                                               | Yes                                                 | NA                                                                | Unclear                                                   | Yes                                                                                   | Yes                                                                                                                                 | NA                                                                         | Yes                                                              | Yes                                           | Yes                                            | Yes                                                                                                                                                                                       | 12         |
| <b>Cheung et al (2005)</b>   | Yes                                                                                | Yes                                              | Yes                                               | Yes                                                 | NA                                                                | Unclear                                                   | Yes                                                                                   | Yes                                                                                                                                 | Yes                                                                        | Yes                                                              | Yes                                           | Yes                                            | Yes                                                                                                                                                                                       | 12         |
| <b>Cooper et al (2000)</b>   | Yes                                                                                | Yes                                              | Yes                                               | NA                                                  | NA                                                                | Unclear                                                   | Yes                                                                                   | No                                                                                                                                  | Yes                                                                        | Yes                                                              | Yes                                           | Yes                                            | Yes                                                                                                                                                                                       | 11         |
| <b>Scott et al (2006)</b>    | Yes                                                                                | Yes                                              | Yes                                               | NA                                                  | NA                                                                | Unclear                                                   | Yes                                                                                   | No                                                                                                                                  | NA                                                                         | Yes                                                              | Yes                                           | Yes                                            | Yes                                                                                                                                                                                       | 11         |
| <b>Khadka et al (2010)</b>   | Unclear                                                                            | Unclear                                          | Yes                                               | NA                                                  | NA                                                                | Unclear                                                   | Yes                                                                                   | Unclear                                                                                                                             | Yes                                                                        | Unclear                                                          | Unclear                                       | Unclear                                        | Yes                                                                                                                                                                                       | 7          |
| <b>Miura et al (2015)</b>    | Unclear                                                                            | Unclear                                          | Yes                                               | NA                                                  | NA                                                                | Unclear                                                   | Yes                                                                                   | Unclear                                                                                                                             | Yes                                                                        | Unclear                                                          | Unclear                                       | Yes                                            | Yes                                                                                                                                                                                       | 7          |
| <b>Mohr et al (2014)</b>     | Unclear                                                                            | Unclear                                          | Yes                                               | NA                                                  | NA                                                                | Unclear                                                   | Yes                                                                                   | Yes                                                                                                                                 | Yes                                                                        | Yes                                                              | Yes                                           | Yes                                            | Yes                                                                                                                                                                                       | 10         |
| <b>Moreau et al (2001)</b>   | Unclear                                                                            | Unclear                                          | Yes                                               | NA                                                  | NA                                                                | Unclear                                                   | Yes                                                                                   | Yes                                                                                                                                 | Yes                                                                        | Yes                                                              | Yes                                           | Yes                                            | Yes                                                                                                                                                                                       | 10         |
| <b>Sohn (2007)</b>           | Yes                                                                                | Yes                                              | No                                                | NA                                                  | NA                                                                | Unclear                                                   | Yes                                                                                   | Yes                                                                                                                                 | Yes                                                                        | Yes                                                              | Yes                                           | Yes                                            | Yes                                                                                                                                                                                       | 12         |
| <b>Sulaeman et al (2020)</b> | Yes                                                                                | Yes                                              | Yes                                               | NA                                                  | NA                                                                | Unclear                                                   | Yes                                                                                   | Unclear                                                                                                                             | Yes                                                                        | Yes                                                              | Yes                                           | Yes                                            | Yes                                                                                                                                                                                       | 11         |
| <b>Wolff et al (2016)</b>    | Yes                                                                                | Yes                                              | Yes                                               | NA                                                  | NA                                                                | Yes                                                       | Yes                                                                                   | No                                                                                                                                  | Yes                                                                        | Yes                                                              | Yes                                           | Yes                                            | Yes                                                                                                                                                                                       | 12         |
| <b>Wong et al (2018)</b>     | Yes                                                                                | Yes                                              | Yes                                               | NA                                                  | NA                                                                | Unclear                                                   | Yes                                                                                   | No                                                                                                                                  | Yes                                                                        | Yes                                                              | Yes                                           | Yes                                            | Yes                                                                                                                                                                                       | 11         |

Appendix: Risk of bias score domain of quasi-experimental studies measured using JBI critical appraisal tool

| Authors & year        | 1. Is it clear in the study what is the 'cause' and what is the 'effect' (i.e. there is no confusion about which variable comes first)? | 2. Were the participants included in any comparisons similar? | 3. Were the participants included in any comparisons receiving similar treatment/care, other than the exposure or intervention of interest? | 4. Was there a control group? | 5. Were there multiple measurements of the outcome both pre and post the intervention/exposure? | 6. Was follow up complete and if not, were differences between groups in terms of their follow up adequately described and analyzed? | 7. Were the outcomes of participants included in any comparisons measured in the same way? | 8. Were outcomes measured in a reliable way? | 9. Was appropriate statistical analysis used? | Score (9) |
|-----------------------|-----------------------------------------------------------------------------------------------------------------------------------------|---------------------------------------------------------------|---------------------------------------------------------------------------------------------------------------------------------------------|-------------------------------|-------------------------------------------------------------------------------------------------|--------------------------------------------------------------------------------------------------------------------------------------|--------------------------------------------------------------------------------------------|----------------------------------------------|-----------------------------------------------|-----------|
| Nóbrega et al (2013)  | Yes                                                                                                                                     | Yes                                                           | Unclear                                                                                                                                     | No                            | na                                                                                              | Yes                                                                                                                                  | Yes                                                                                        | Yes                                          | Yes                                           | 7         |
| Sulaeman et al (2020) | Yes                                                                                                                                     | Yes                                                           | Unclear                                                                                                                                     | Yes                           | No                                                                                              | Unclear                                                                                                                              | Yes                                                                                        | Unclear                                      | No                                            | 5         |

**Appendix: Risk of bias score domain of cross-sectional studies measured using JBI critical appraisal tool**

| <b>Authors &amp; year</b>     | <b>1. Were the criteria for inclusion in the sample clearly defined?</b> | <b>2. Were the study subjects and the setting described in detail?</b> | <b>3. Was the exposure measured in a valid and reliable way?</b> | <b>4. Were objective, standard criteria used for measurement of the condition?</b> | <b>5. Were confounding factors identified?</b> | <b>6. Were strategies to deal with confounding factors stated?</b> | <b>7. Were the outcomes measured in a valid and reliable way?</b> | <b>8. Was appropriate statistical analysis used?</b> | <b>Score (8)</b> |
|-------------------------------|--------------------------------------------------------------------------|------------------------------------------------------------------------|------------------------------------------------------------------|------------------------------------------------------------------------------------|------------------------------------------------|--------------------------------------------------------------------|-------------------------------------------------------------------|------------------------------------------------------|------------------|
| <b>Alsairafi et al (2010)</b> | Yes                                                                      | Yes                                                                    | Unclear                                                          | Yes                                                                                | Yes                                            | Yes                                                                | Yes                                                               | Yes                                                  | 7                |
| <b>Islam et al (2023)</b>     | Yes                                                                      | Yes                                                                    | Unclear                                                          | Yes                                                                                | Yes                                            | Yes                                                                | Yes                                                               | Yes                                                  | 7                |
| <b>Yang et al (2019)</b>      | Yes                                                                      | Yes                                                                    | Unclear                                                          | Yes                                                                                | Yes                                            | Yes                                                                | Yes                                                               | Yes                                                  | 7                |

## Appendix: Characteristics of included articles (interventional studies) (1/2)

| Study                      | Aim                                                                                                                                                                                                                                                                                     | Country     | Study design                            | Sample size (randomized)                 | Number of completers                    | Sex of participants | Age of participants | Smoking status                                              |
|----------------------------|-----------------------------------------------------------------------------------------------------------------------------------------------------------------------------------------------------------------------------------------------------------------------------------------|-------------|-----------------------------------------|------------------------------------------|-----------------------------------------|---------------------|---------------------|-------------------------------------------------------------|
| <b>Carpes et al (2021)</b> | To evaluate the effect of a beach tennis session on 24-h ambulatory blood pressure in adults with hypertension.                                                                                                                                                                         | Brazil      | Randomized crossover trial              | 24                                       | 24                                      | M- 12, F-12         | 35 to 60 years      | No smokers                                                  |
| <b>Cheung et al (2005)</b> | To study the effect of Guolin Qigong on blood pressure. Qigong is a traditional Chinese exercise consisting of breathing and gentle movements.                                                                                                                                          | Hong Kong   | Randomized controlled trial             | 88 (Qigong 47, Conventional Exercise 41) | Qigong (37), Conventional Exercise (36) | M- 37, F- 51        | 18 to 75 years      | 5 smokers (3 in the intervention arm, 2 in the control arm) |
| <b>Cooper et al (2000)</b> | To investigate the effect of a six-week program of moderate-intensity exercise on daytime ambulatory blood pressure among unmedicated, sedentary adults aged 25 years to 63 years with the office blood pressure of 150 mmHg to 180 mmHg systolic and/or 91 mmHg to 110 mmHg diastolic. | UK          | Randomized controlled trial             | 90 (IN-48, CON-42)                       | 86 (In-47, CON-39)                      | M-72, F-18          | 25 to 63 years      | Not mentioned                                               |
| <b>Scott et al (2006)</b>  | To assess whether four 10-minute 'snacks' of exercise per day are as effective at lowering blood pressure as 40 minutes of continuous moderate exercise, when compared with no exercise.                                                                                                | New Zealand | Single-blind randomised crossover trial | 35                                       | 31                                      | M- 16, F-19         | Mean age 53         | Not mentioned                                               |
| <b>Khadka et al (2010)</b> | To investigate the effect of yoga on cardiovascular autonomic reactivity in essential hypertensive patients.                                                                                                                                                                            | Nepal       | Randomised controlled trial             | 14 (IN-7, CON-7)                         | 14                                      | M, F                | 30 to 60 years      | Not mentioned                                               |
| <b>Miura et al (2015)</b>  | The aim of this study was to compare the effects of exercise training on arterial stiffness between older hypertensive and healthy females.                                                                                                                                             | Japan       | Randomised controlled trial             | 221                                      | 221                                     | F                   | 66 to 88 years      | Not mentioned                                               |

| Study                        | Aim                                                                                                                                                                                                                                                                 | Country   | Study design                 | Sample size (randomized)           | Number of completers | Sex of participants | Age of participants | Smoking status |
|------------------------------|---------------------------------------------------------------------------------------------------------------------------------------------------------------------------------------------------------------------------------------------------------------------|-----------|------------------------------|------------------------------------|----------------------|---------------------|---------------------|----------------|
| <b>Mohr et al (2014)</b>     | The objective of the present study was to test the hypothesis that high-intensity swim training is an efficient strategy to reduce blood pressure and improve the cardiovascular health profile in sedentary premenopausal women with mild to moderate hypertension | UK        | Randomized controlled trial  | 62 (HIT IN-21, MOD IN-21, CON-20)  | 62                   | F                   | 35 to 49            | Not mentioned  |
| <b>Moreau et al (2001)</b>   | The present study tested the hypothesis that walking activity following the ACSM-CDC physical activity recommendation would lower BP in postmenopausal women with high BP                                                                                           | USA       | Randomized controlled trial  | 24 (IN- 15, CON-9)                 | 24                   | F                   | 51 to 56            | non-smokers    |
| <b>Nóbrega et al (2013)</b>  | To compare the acute pressoric response of a soccer match with a walking/running session in recreational soccer practices.                                                                                                                                          | Brazil    | Quasi-experimental           | 8                                  | 8                    | M                   | 40 to 60 years      | Not mentioned  |
| <b>Shakoor et al (2020)</b>  | This study aimed to investigate the Acute HIIT and IHG exercise on hemodynamic responses (blood pressure [systolic, diastolic, mean arterial pressure], rate pressure product and heart rate) in women with hypertension.                                           | Iran      | Randomised controlled trial  | 45 (HIIT IN-15, IHG IN-15, CON-15) | 45                   | F                   | 45±5 years          | Non-smoker     |
| <b>Sohn(2007)</b>            | To determine whether the encouragement of walking an extra 30 minutes a day decreases blood pressure in adult African Americans with newly diagnosed hypertension.                                                                                                  | USA       | Randomized controlled study. | 19 (IN-9, CON-10)                  | 18 (IN-8, CON-10)    | M- 6, F- 12         | 25 to 59 years      | Not mentioned  |
| <b>Sulaeman et al (2020)</b> | To assess the effectiveness of family training towards the regularity of progressive muscle relaxation exercise implementation in hypertension patients.                                                                                                            | Indonesia | quasi-experimental study     | 60                                 | 60                   | M-17, F-43          | 26 to 55            | Not mentioned  |

| Study                     | Aim                                                                                                                                                                                                      | Country | Study design                                            | Sample size (randomized) | Number of completers  | Sex of participants | Age of participants | Smoking status |
|---------------------------|----------------------------------------------------------------------------------------------------------------------------------------------------------------------------------------------------------|---------|---------------------------------------------------------|--------------------------|-----------------------|---------------------|---------------------|----------------|
| <b>Wolff et al (2016)</b> | The present study was designed to evaluate yoga's impact on blood pressure (BP) and quality of life (QOL) and on stress, depression and anxiety in patients with hypertension in a primary care setting. | Sweden  | Multi-centre parallel group randomized controlled trial | 191 (IN- 96, CON- 95)    | 171 (IN- 85, CON- 86) | M- 44, F- 52        | 30 to 80            | Not mentioned  |
| <b>Wong et al (2018)</b>  | To examine the effects of a stair climbing (SC) regimen on arterial stiffness (pulse wave velocity [PWV]), BP, and leg strength in postmenopausal women with stage 2 hypertension                        | Korea   | Parallel experimental design                            | 41 (IN-21, CON- 20)      | 41                    | F                   | 49-67 years         | No smokers     |

#### Appendix: Characteristics of included articles (interventional studies) (2/2)

| Study                      | Intervention | Duration | Intensity                                    | Frequency   | Intervention period | Outcome variables | Adherence     | Adverse event             | Note                                                                                                                                               | ROB score    | MA |
|----------------------------|--------------|----------|----------------------------------------------|-------------|---------------------|-------------------|---------------|---------------------------|----------------------------------------------------------------------------------------------------------------------------------------------------|--------------|----|
| <b>Carpes et al (2021)</b> | Beach tennis | 45 mins  | Followed high, moderate & vigorous intensity | Total twice | 5-10 days           | SBP, DBP          | Not mentioned | No adverse event happened | This study was partially funded by the Research and Education Fund of the Hospital de Clínicas de Porto Alegre (FIPE/ HCPA, Grant number 18-0642). | 12 out of 13 | No |

|                            |               |                                                                                                                                                                                                                                                                                                              |          |                 |           |          |               |                                                                                                               |                                                                                                                                                                                         |              |     |
|----------------------------|---------------|--------------------------------------------------------------------------------------------------------------------------------------------------------------------------------------------------------------------------------------------------------------------------------------------------------------|----------|-----------------|-----------|----------|---------------|---------------------------------------------------------------------------------------------------------------|-----------------------------------------------------------------------------------------------------------------------------------------------------------------------------------------|--------------|-----|
| <b>Cheung et al (2005)</b> | Goulin qigong | Qigong for 60 min in the morning and 15 min in the evening every day for the duration of the study, comprising walking exercises for 40 min, eight sets of stretching exercises and three sets of pressure-relieving exercises in the morning and three sets of pressure-relieving exercises in the evening. | Moderate | Twice everyday  | 16 weeks  | SBP, DBP | Not mentioned | A woman in the qigong group experienced vestibular neuronitis that was not related to the practice of qigong. | The study was funded by a charitable donation for research from the Li Ka Shing Foundation. The Foundation is not involved in the design, conduct, analysis and reporting of the study. | 12 out of 13 | No  |
| <b>Cooper et al (2000)</b> | Walking       | 30 minutes daily                                                                                                                                                                                                                                                                                             | Moderate | 5 days per week | Six weeks | SBP, DBP | Not mentioned | Not mentioned                                                                                                 | This study was funded by the NHS Executive South and West Research and Development Directorate.                                                                                         | 11 out of 13 | Yes |

|                            |                                                                                                             |                                                                                                                                              |          |                    |           |          |               |               |                                                                                                                                                                                                                                                                                                                                  |              |     |
|----------------------------|-------------------------------------------------------------------------------------------------------------|----------------------------------------------------------------------------------------------------------------------------------------------|----------|--------------------|-----------|----------|---------------|---------------|----------------------------------------------------------------------------------------------------------------------------------------------------------------------------------------------------------------------------------------------------------------------------------------------------------------------------------|--------------|-----|
| <b>Scott et al (2006)</b>  | Walking                                                                                                     | 40 mins per day, 4*10 minutes walking                                                                                                        | Moderate | once in a day      | 10 days   | SBP, DBP | Not mentioned | Not mentioned | The initial study was funded by the Health Research Council of New Zealand. Phase 3 of the study was funded by Child Health Research Foundation, Becroft Foundation, and Auckland Medical Research Foundation. It was conducted in the Children's Research Centre, which the Starship Foundation support Auckland Healthcare Ltd | 11 out of 13 | No  |
| <b>Khadka et al (2010)</b> | Different kinds of Yoga practices (Strengthening exercise, Yogic asanas, Shavasana, Meditation & Pranayama) | 30 mins in a day. Strengthening exercise - 5mins<br>Yogic asanas- 6/7 mins<br>Shavasana - 5 mins<br>Meditation- 5 mins<br>Pranayama - 4 mins | Moderate | Six days in a week | Six weeks | SBP, DBP | Not mentioned | Not mentioned |                                                                                                                                                                                                                                                                                                                                  | 7 out of 13  | Yes |



|                             |                                                                                                                           |                                                                                                                                             |                                                                  |                      |          |              |                                                       |               |                                                                                                                                                     |              |     |
|-----------------------------|---------------------------------------------------------------------------------------------------------------------------|---------------------------------------------------------------------------------------------------------------------------------------------|------------------------------------------------------------------|----------------------|----------|--------------|-------------------------------------------------------|---------------|-----------------------------------------------------------------------------------------------------------------------------------------------------|--------------|-----|
| <b>Miura et al (2015)</b>   | Traning: 1. resistance exercises for circuit training and 2. chair-based exercise for the lower extremities.              | 90 minutes daily                                                                                                                            | Moderate                                                         | Twice a week         | 12 weeks | SBP, DBP, HR | Not mentioned                                         | Not mentioned | This study was supported by a grant-in-aid for Scientific Research from the Ministry of Education, Science, Sports and Culture of Japan (15700441). | 7 out of 13  | Yes |
| <b>Mohr et al (2014)</b>    | Swimming                                                                                                                  | HIT: 15-25mins<br>MOD: 1 hour daily                                                                                                         | HIT: High-intensity swimming<br>MOD: Moderate intensity swimming | three times per week | 15 weeks | SBP, DBP, HR | Not mentioned                                         | Not mentioned |                                                                                                                                                     | 10 out of 13 | Yes |
| <b>Moreau et al (2001)</b>  | Walking                                                                                                                   | 3km/day or more than their lifestyle of walking                                                                                             | Moderate                                                         | Once a day           | 24 weeks | SBP, DBP, HR | Not mentioned                                         | Not mentioned |                                                                                                                                                     | 10 out of 13 | Yes |
| <b>Nóbrega et al (2013)</b> | Soccer & walking/running                                                                                                  | Soccer - 60 mins & Walking/running - 60 mins                                                                                                | High                                                             | Once a day           | one day  | SBP, DBP     | Not mentioned                                         | Not mentioned |                                                                                                                                                     | 7 out of 13  | No  |
| <b>Shakoor et al (2020)</b> | High-intensity interval training (HIIT): Quinton treadmill; and isometric handgrip (IHG) exercise: Isometric contractions | HIIT: 4x4 min intervals at 85-95% peak HR, interspersed with a 3-min active recovery period at ≈70% Peak HR. IHG: 4x2 min by 2 minutes rest | Moderate                                                         | –                    | –        | SBP, DBP     | All the participants completed their training program | Not mentioned | This study was approved by the Research Ethics Committee of Shiraz University Of Medical Sciences-Iran (IR.SUMS.REHAB.REC.1398.001)                 | 5 out of 13  | Yes |

|                              |                                                                            |                  |          |               |          |                        |                                                                                                                                     |               |                                                                                                                                                                  |              |     |
|------------------------------|----------------------------------------------------------------------------|------------------|----------|---------------|----------|------------------------|-------------------------------------------------------------------------------------------------------------------------------------|---------------|------------------------------------------------------------------------------------------------------------------------------------------------------------------|--------------|-----|
| <b>Sohn(2007)</b>            | Walking                                                                    | 30 minutes daily | Moderate | once in a day | 26 weeks | SBP, DBP               | Not mentioned                                                                                                                       | Not mentioned | The study was partly funded by the Establishment of Departments of Family Medicine Grant No. 5 d32HP10234 from the Health Resources and Services Administration. | 12 out of 13 | Yes |
| <b>Sulaeman et al (2020)</b> | Progressive muscle relaxation exercise technique consisted of 16 movements | 32-48 mins       | Moderate | twice a day   | 6 days   | Mean Arterial Pressure | 90% doing the exercise regularly in the training meanwhile, two people doing the exercise regularly but did not follow the training | Not mentioned | The study was approved by the medical ethical commission of the University of Mataram and informed consent was taken from all participants                       | 11 out of 13 | No  |

|                           |                           |            |          |                                                                                   |          |                 |                                            |                                                                               |                                                                                                                                                                                                                                                                                                                             |              |     |
|---------------------------|---------------------------|------------|----------|-----------------------------------------------------------------------------------|----------|-----------------|--------------------------------------------|-------------------------------------------------------------------------------|-----------------------------------------------------------------------------------------------------------------------------------------------------------------------------------------------------------------------------------------------------------------------------------------------------------------------------|--------------|-----|
| <b>Wolff et al (2016)</b> | Home based Kundalini yoga | 15 minutes | Moderate | Twice daily                                                                       | 12 weeks | SBP, DBP        | Adherence to the yoga intervention was 78% | There were no serious adverse events reported by the yoga group participants. | This study was funded by the Faculty of Medicine at Lund University, the Ekhaga Foundation, the Swedish Heart-Lung Foundation and the Swedish Southern Health Care Region, Agreement for Medical Education and Research (ALF) funding from Region Skåne and a Swedish Research Council grant awarded to Kristina Sundquist. | 12 out of 13 | Yes |
| <b>Wong et al (2018)</b>  | Stair climbing            | 192 steps  | Moderate | Four days a week in weeks 1 and 2, By the last three weeks (10-12)- 4 days a week | 12 weeks | baPWV, SBP, DBP | Not mentioned                              | Not mentioned                                                                 | All protocols were approved by the Institutional Review Board of the Public Institutional Review Board designated by the Ministry of Health and Welfare (SH-IRB 2017-13), registered in Clinicaltrials.gov (NCT03254251)                                                                                                    | 11 out of 13 | Yes |

**Appendix: Characteristics of included articles (observational studies)**

| Study                         | Aim                                                                                                                                                                                                                         | Country    | Study design    | Sample size | Sex of participants | Age of participants   | Smoking?                                                    | Type of LTPA                                       | Outcome variables | ROB score  | MA |
|-------------------------------|-----------------------------------------------------------------------------------------------------------------------------------------------------------------------------------------------------------------------------|------------|-----------------|-------------|---------------------|-----------------------|-------------------------------------------------------------|----------------------------------------------------|-------------------|------------|----|
| <b>Alsairafi et al (2010)</b> | To demonstrate the effect of physical activity on controlling blood pressure among hypertensive patients from the Mishref area of Kuwait.                                                                                   | Kuwait     | Cross-sectional | 240         | M-87, F-148         | Mean age 48.2+/- 9 SD | Smoking-37                                                  | Moderate/vigorous activity & relax/simple activity | SBP, DBP          | 7 out of 8 | No |
| <b>Islam et al. (2023)</b>    | Aim to investigate the associations of current physical activity levels, sedentary time, knowledge of and attitude towards physical activity with blood pressure in people with hypertension in a rural area in Bangladesh. | Bangladesh | Cross-sectional | 307         | M-153, F-154        | 30 to 75 years        | Smoking-62                                                  | Moderate intensity                                 | SBP, DBP          | 7 out of 8 | No |
| <b>Yang et al (2019)</b>      | The associations between various LTDW durations and BP readings were examined among Chinese older adults. The association between LTDW time and BP outcomes were examined in Chinese older adults with hypertension.        | China      | Cross-Sectional | 780         | M-383, F-397        | >65 years             | Nonsmoker-455<br>Former Smoker -109<br>Current smoker - 216 | Daily walking                                      | SBP, DBP          | 7 out of 8 | No |

## Appendix: Sensitivity analysis 1: Leisure-time physical activity versus control, including crossover trials, Outcome- Systolic blood pressure\*

### A. All types of leisure-time physical activities

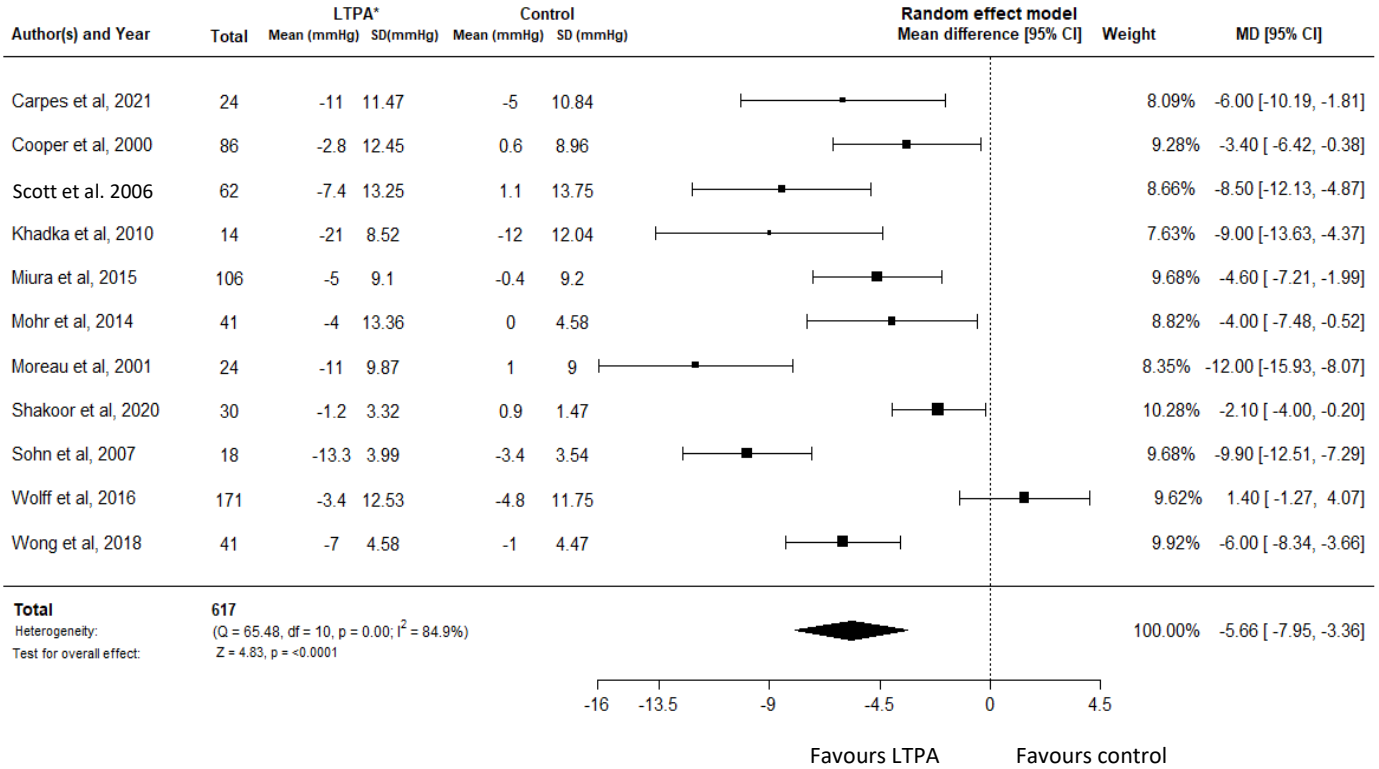

### B. Leisure-time walking

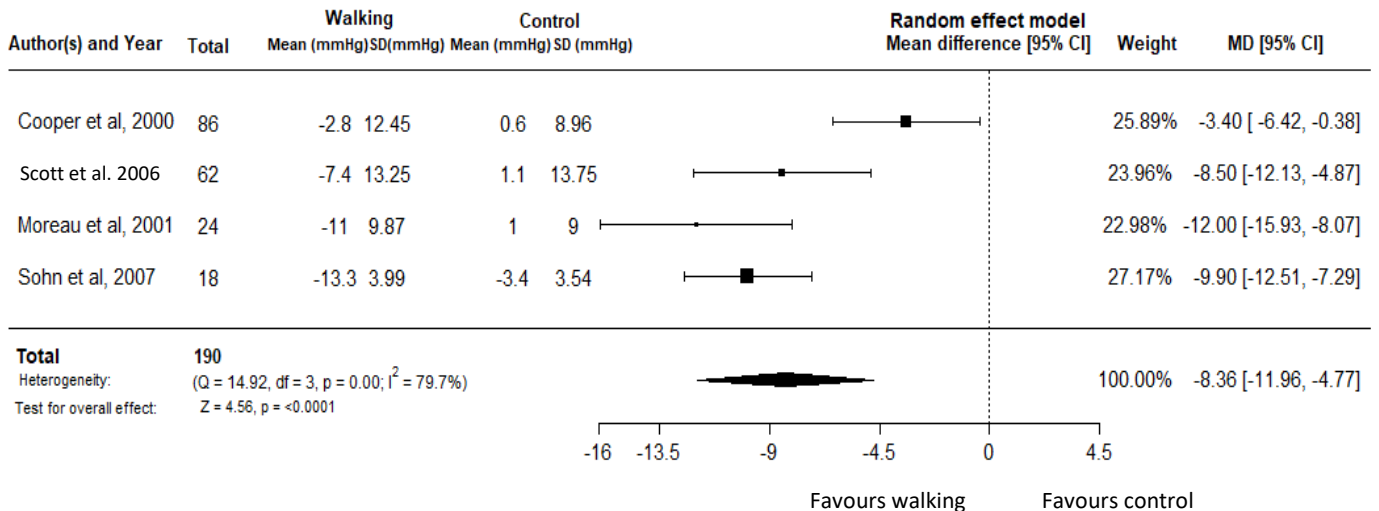

\*Carpes et al. 2021 examine the effect of high-intensity exercise, beach tennis on lowering blood pressure.

**Appendix: Sensitivity analysis 1: Leisure-time physical activity versus control, including crossover trials, Outcome- Diastolic blood pressure\***

**A. All types of leisure-time physical activities**

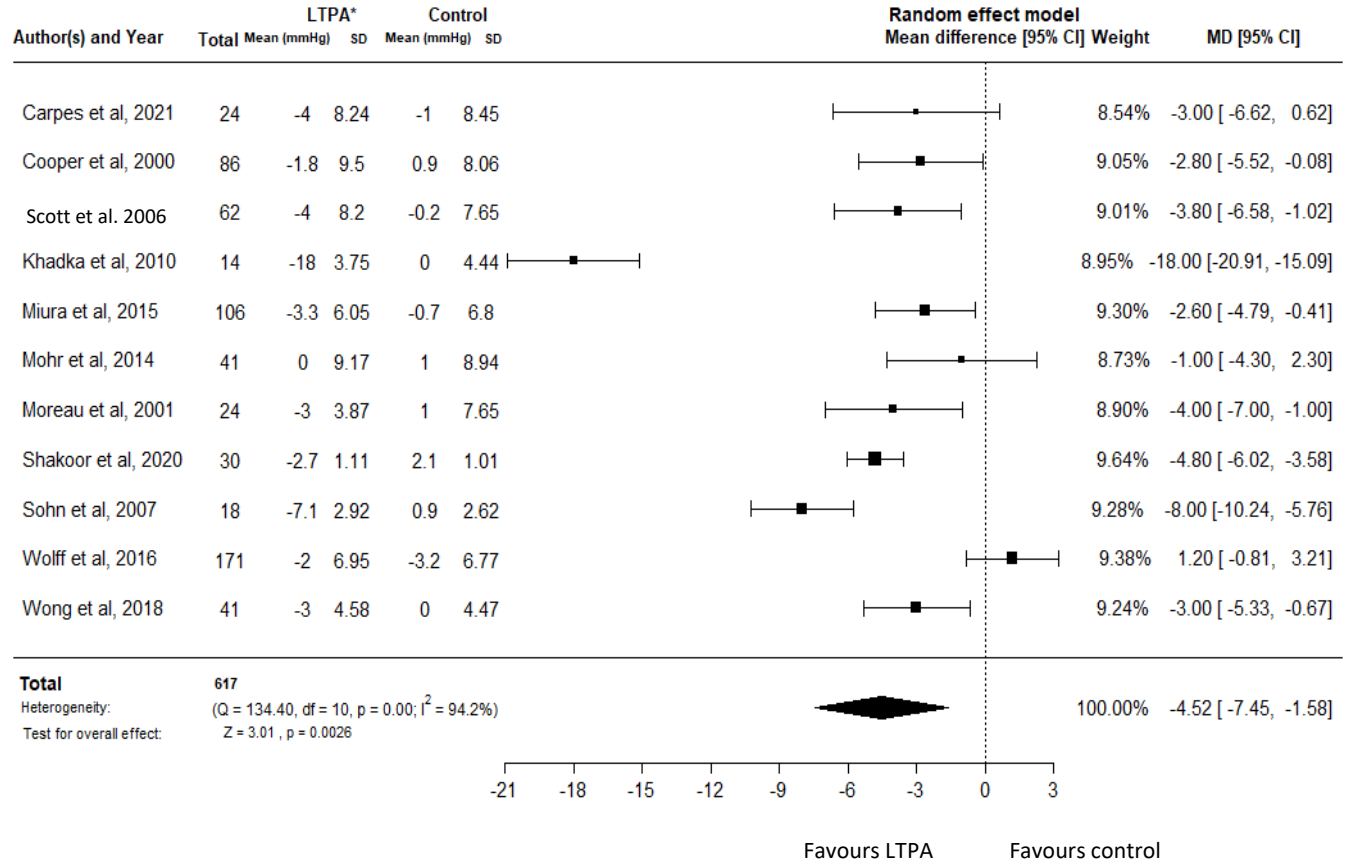

**B. Leisure-time walking**

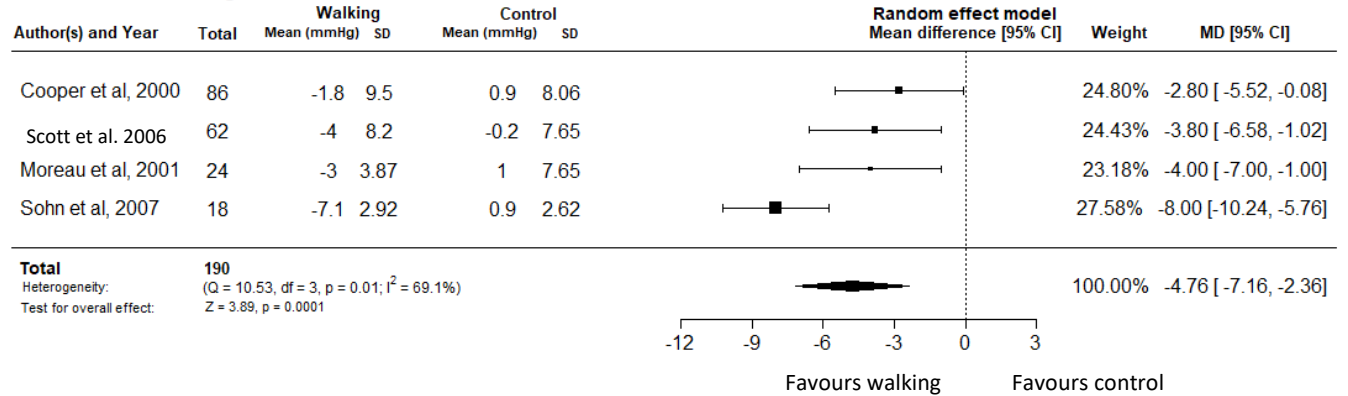

\*Carpes et al. 2021 examine the effect of high-intensity exercise, beach tennis on lowering blood pressure.

## Appendix: Sensitivity analysis 1: Moderate-intensity leisure-time physical activity versus control including crossover trials, Outcome- Heart best/min

### A. All types of leisure-time physical activities

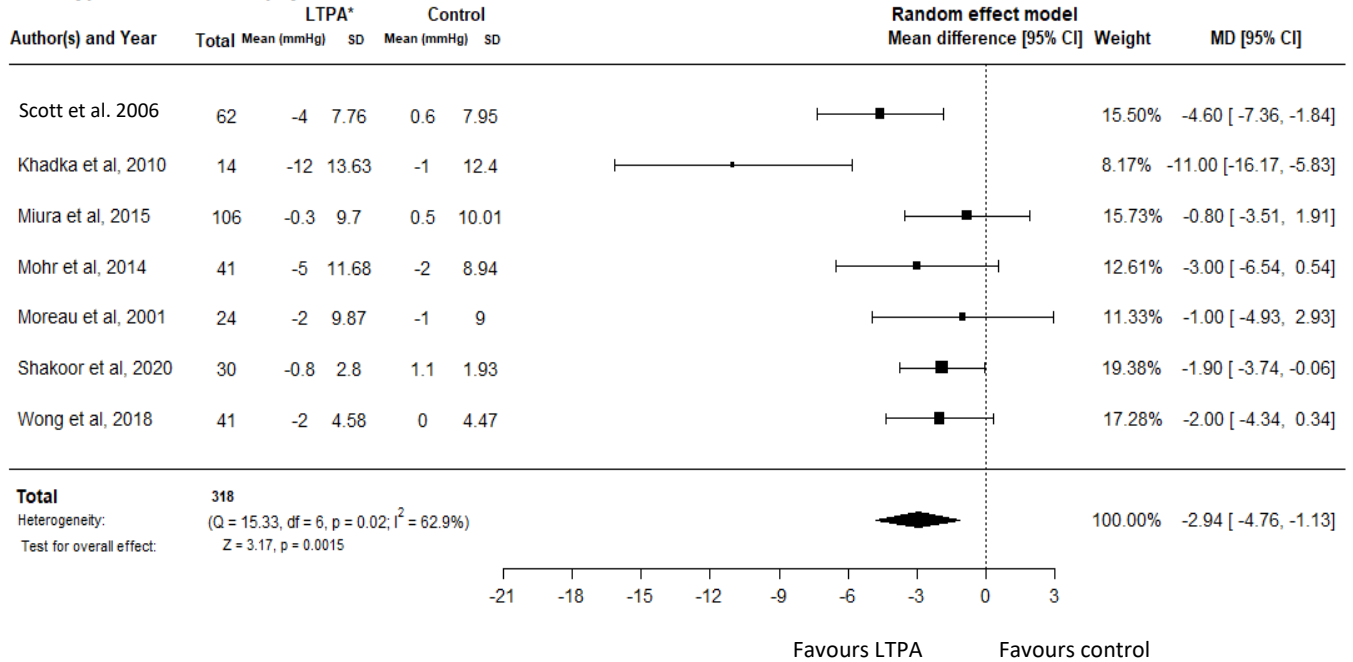

### B. Leisure-time walking

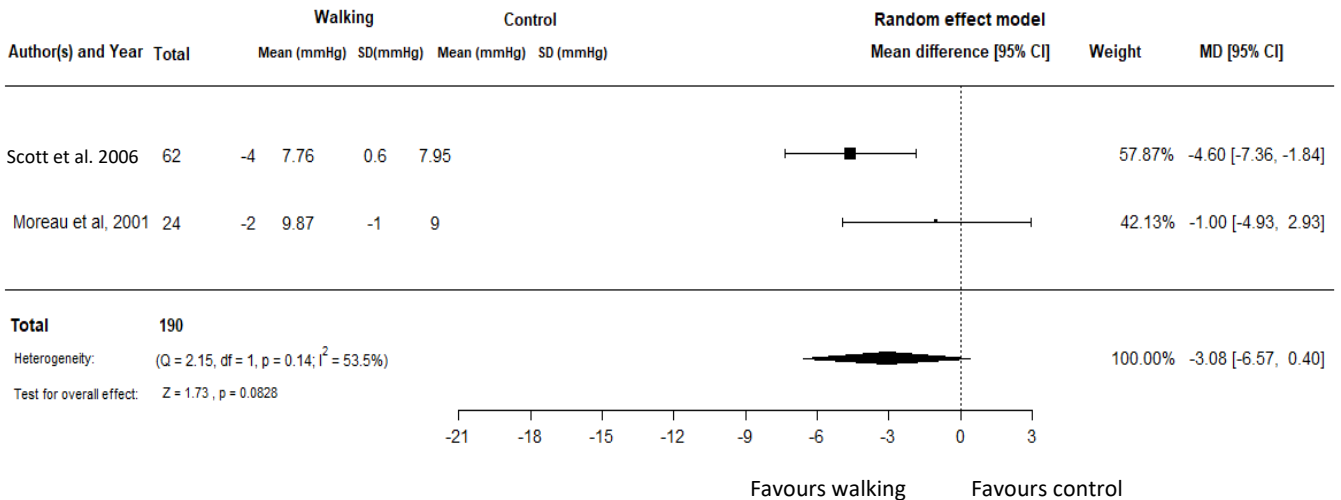

**Appendix: Sensitivity analysis 2: Moderate-intensity leisure-time physical activity versus control excluding trials with unclear randomization and treatment concealment, Outcome- Systolic blood pressure**

**A. All types of leisure-time physical activities**

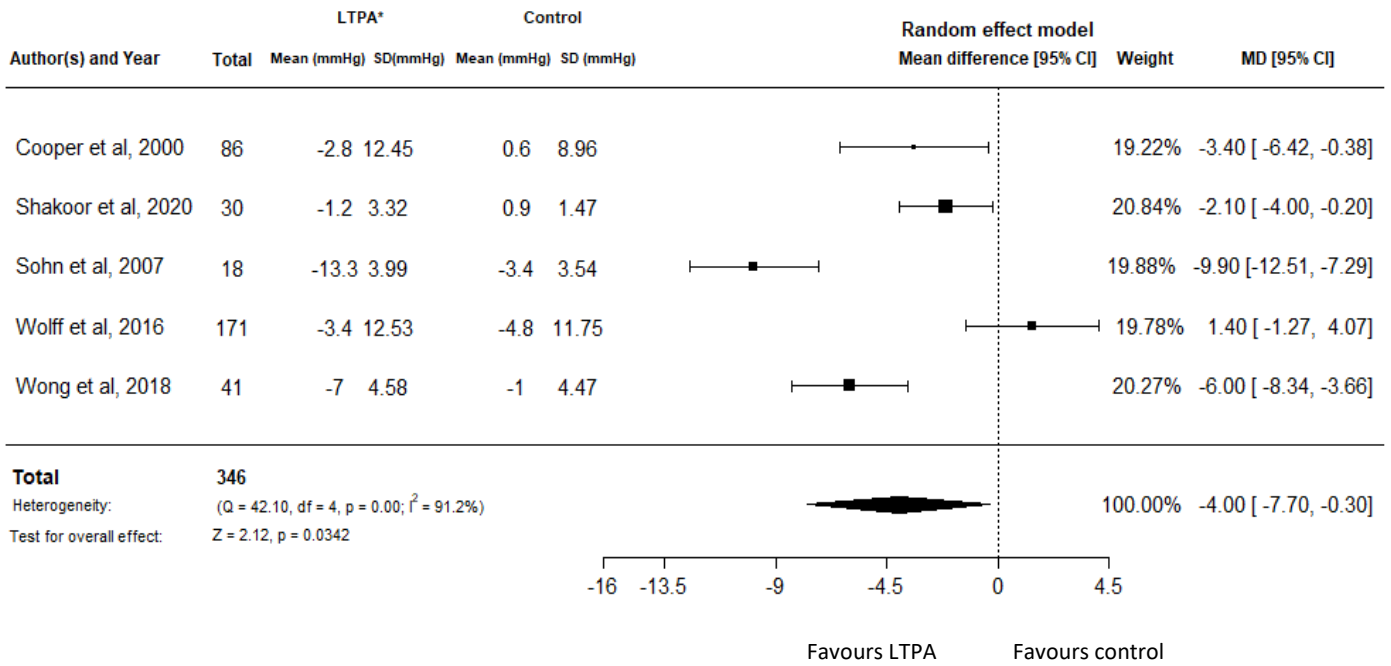

**B. Leisure-time walking**

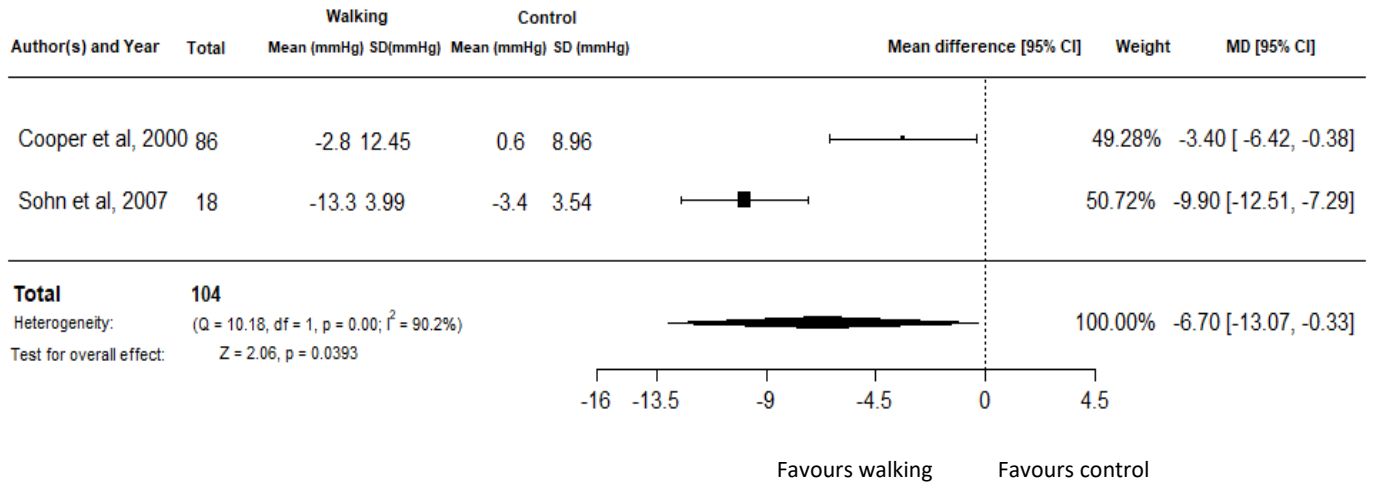



**Appendix: Sensitivity analysis 2: Moderate-intensity leisure-time physical activity versus control excluding trials with unclear randomization and treatment concealment, Outcome: Diastolic blood pressure**

**A. All types of leisure-time physical activities**

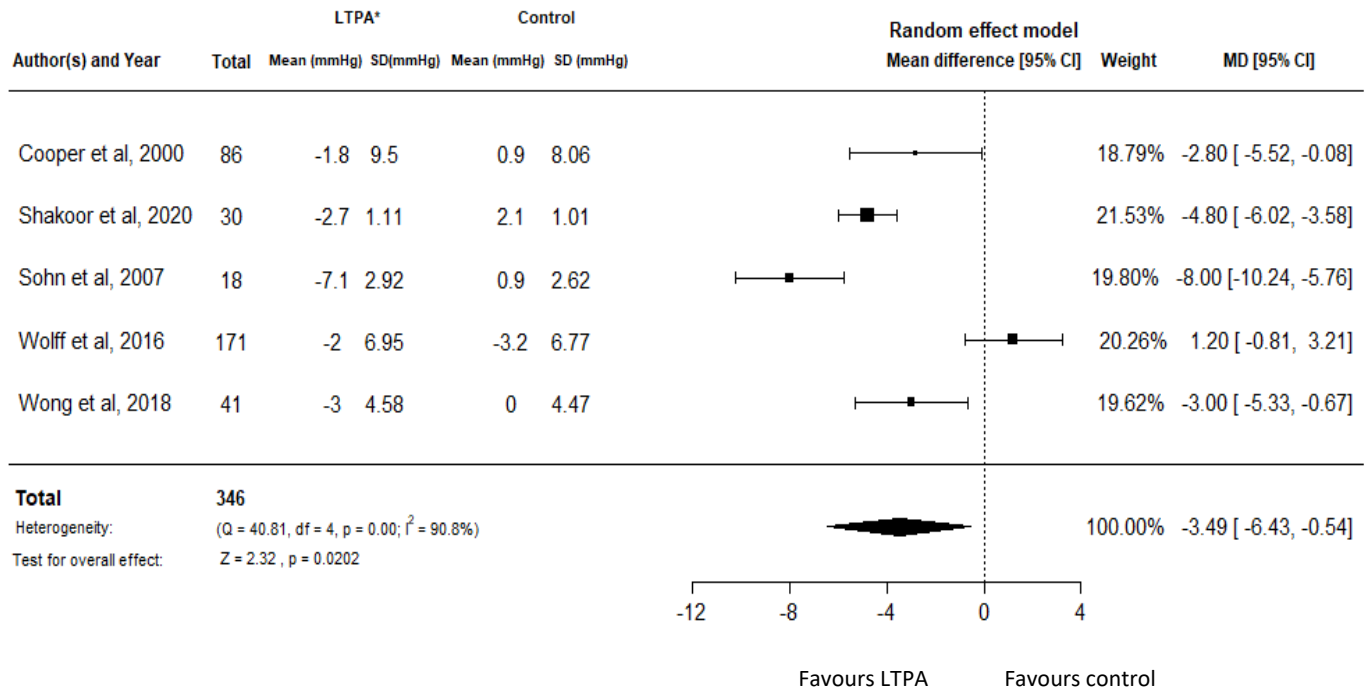

**B. Leisure-time walking**

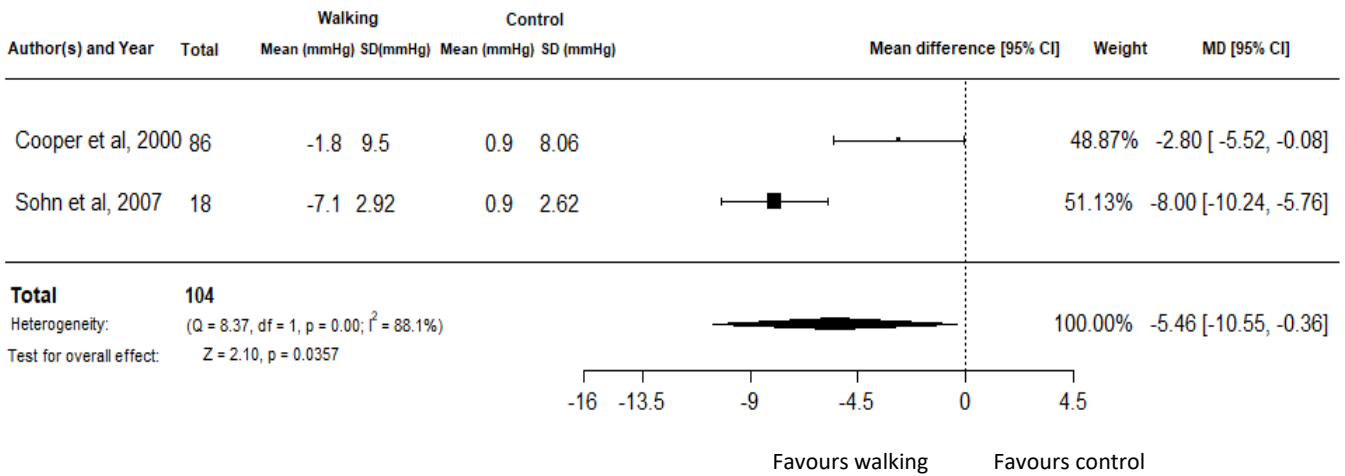

**Appendix: Sensitivity analysis 2: Moderate-intensity leisure-time physical activity versus control excluding trials with unclear randomization and treatment concealment, Outcome: Heartbeat/min**

**All types of leisure-time physical activities**

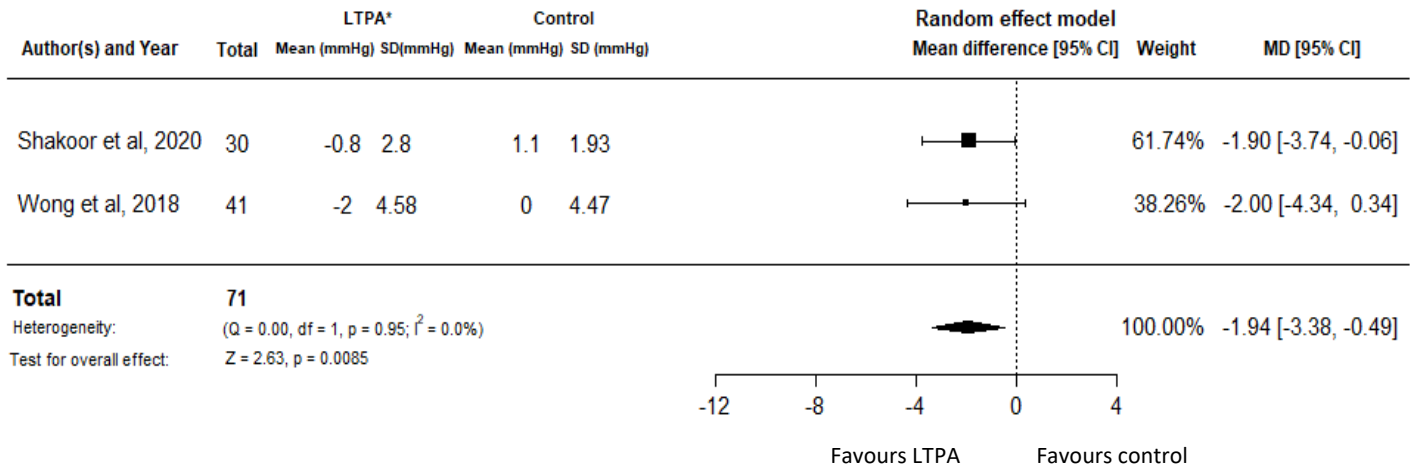

**Appendix: Sensitivity analysis 3: Leisure-time physical activity versus control among parallel randomized control trial, Outcome- Systolic blood pressure**

**All types of leisure-time physical activities**

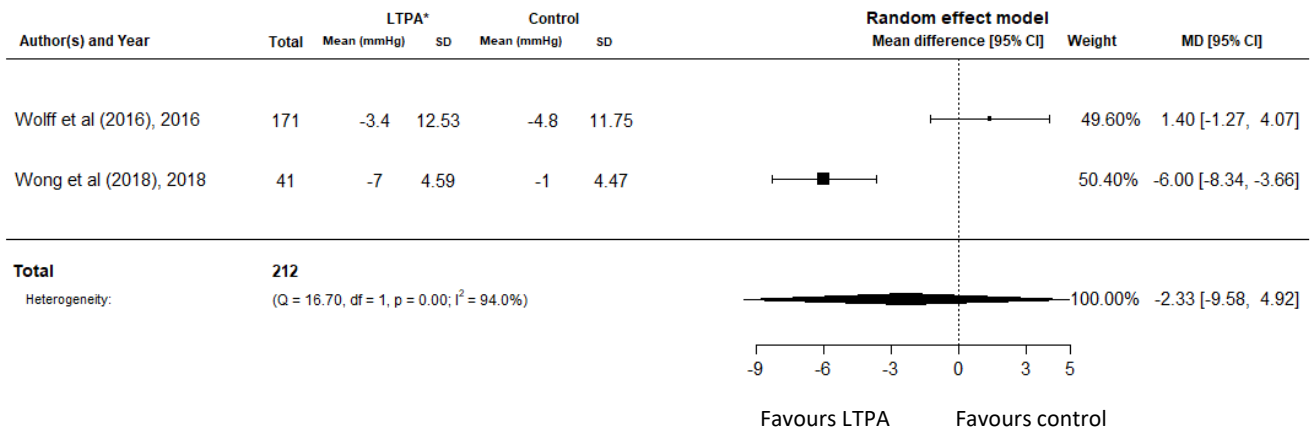

**Appendix: Sensitivity analysis 3: Leisure-time physical activity versus control among parallel randomized control trial, Outcome- Diastolic blood pressure**

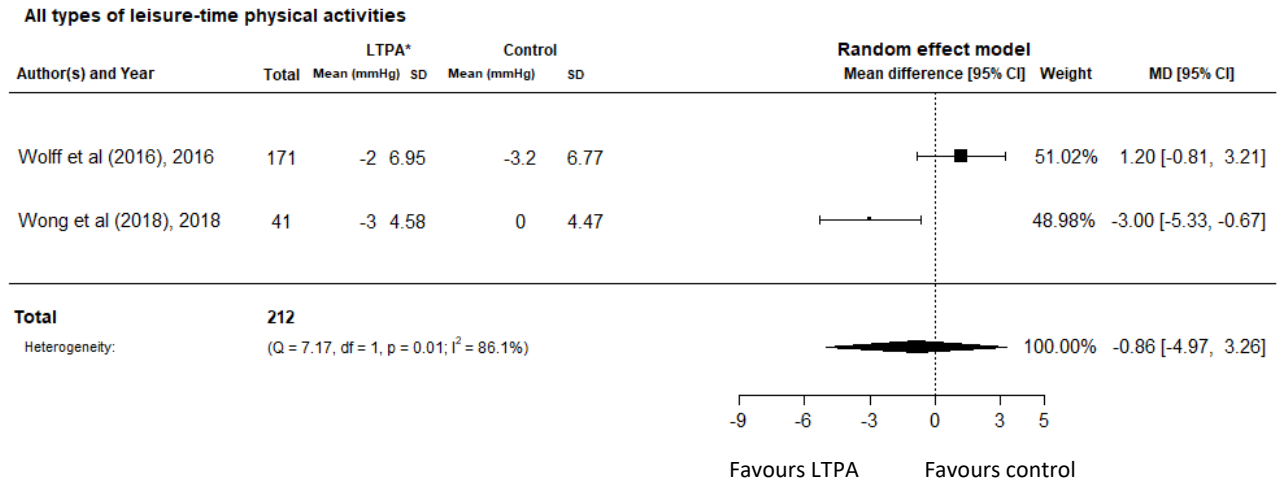

**Appendix: Moderate intensity leisure-time physical activities vs non-intervention control, Outcome variable: Heartbeat/min**

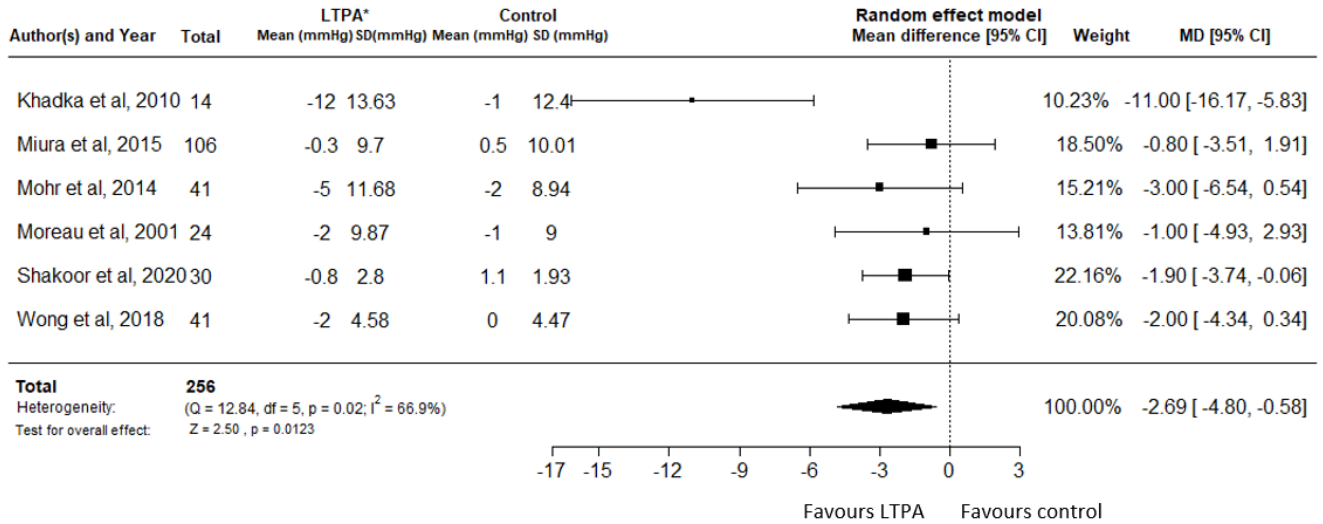

**Appendix Table:** Evidence profile for moderate-intensity leisure-time physical activity

| Certainty assessment |              |              |               |              |             |                      | No. of patients | Anticipated absolute effects (95% CI) |                                    | Certainty | Importance |
|----------------------|--------------|--------------|---------------|--------------|-------------|----------------------|-----------------|---------------------------------------|------------------------------------|-----------|------------|
| No of studies        | Study design | Risk of bias | Inconsistency | Indirectness | Imprecision | Other considerations |                 | Effect with moderate-intensity LTPA   | Effect of non-intervention control |           |            |

**Systolic blood pressure**

|   |                   |             |         |             |         |      |     |                                    |                                  |             |                                                            |
|---|-------------------|-------------|---------|-------------|---------|------|-----|------------------------------------|----------------------------------|-------------|------------------------------------------------------------|
| 9 | randomised trials | not serious | serious | not serious | serious | none | 531 | MD 7.6 mm Hg lower (-11.6 to -3.5) | MD 1.9 mm Hg lower (-4.3 to 0.5) | ⊕⊕○○<br>Low | Moderate-intensity LTPA may reduce systolic blood pressure |
|---|-------------------|-------------|---------|-------------|---------|------|-----|------------------------------------|----------------------------------|-------------|------------------------------------------------------------|

**Diastolic blood pressure**

|   |                   |             |         |             |         |      |     |                               |                                    |             |                                                             |
|---|-------------------|-------------|---------|-------------|---------|------|-----|-------------------------------|------------------------------------|-------------|-------------------------------------------------------------|
| 9 | randomised trials | not serious | serious | not serious | serious | none | 531 | MD 4.5 mm Hg lower (-8 to -1) | MD 0.2 mm Hg lower (-0.95 to 1.35) | ⊕⊕○○<br>Low | Moderate-intensity LTPA may reduce diastolic blood pressure |
|---|-------------------|-------------|---------|-------------|---------|------|-----|-------------------------------|------------------------------------|-------------|-------------------------------------------------------------|

**CI:** confidence interval; **MD:** mean difference

**Appendix Table:** Evidence profile for walking

| Certainty assessment |              |              |               |              |             |                      | No. of patients | Anticipated absolute effects (95% CI) |                                    | Certainty | Importance |
|----------------------|--------------|--------------|---------------|--------------|-------------|----------------------|-----------------|---------------------------------------|------------------------------------|-----------|------------|
| No of studies        | Study design | Risk of bias | Inconsistency | Indirectness | Imprecision | Other considerations |                 | Effect with walking                   | Effect of non-intervention control |           |            |

**Systolic blood pressure**

|   |                   |             |         |             |         |      |     |                                    |                                   |             |                                            |
|---|-------------------|-------------|---------|-------------|---------|------|-----|------------------------------------|-----------------------------------|-------------|--------------------------------------------|
| 3 | randomised trials | not serious | serious | not serious | serious | none | 128 | MD 9.0 mm Hg lower (-15.3 to -2.6) | MD 0.77 mm Hg lower (-3.6 to 2.1) | ⊕⊕○○<br>Low | Walking may reduce systolic blood pressure |
|---|-------------------|-------------|---------|-------------|---------|------|-----|------------------------------------|-----------------------------------|-------------|--------------------------------------------|

**Diastolic blood pressure**

|   |                   |             |         |             |         |      |     |                               |                                    |             |                                             |
|---|-------------------|-------------|---------|-------------|---------|------|-----|-------------------------------|------------------------------------|-------------|---------------------------------------------|
| 3 | randomised trials | not serious | serious | not serious | serious | none | 128 | MD 4.5 mm Hg lower (-8 to -1) | MD 0.2 mm Hg lower (-0.95 to 1.35) | ⊕⊕○○<br>Low | Walking may reduce diastolic blood pressure |
|---|-------------------|-------------|---------|-------------|---------|------|-----|-------------------------------|------------------------------------|-------------|---------------------------------------------|

**CI:** confidence interval; **MD:** mean difference

## Reference

- 1 Mohr, M. *et al.* High-Intensity intermittent swimming improves cardiovascular health status for women with mild hypertension. *BioMed Research International* **2014** (2014). <https://doi.org:10.1155/2014/728289>
- 2 Miura, H., Takahashi, Y., Maki, Y. & Sugino, M. Effects of exercise training on arterial stiffness in older hypertensive females. *European Journal of Applied Physiology* **115** (2015). <https://doi.org:10.1007/s00421-015-3168-y>
- 3 Khadka, R., Paudel, B. H., Sharma, V. P., Kumar, S. & Bhattacharya, N. Effect of Yoga on Cardiovascular Autonomic Reactivity in Essential Hypertensive Patients. *Health Renaissance* **8** (2010). <https://doi.org:10.3126/hren.v8i2.4421>
- 4 Moreau, K. L. *et al.* Increasing daily walking lowers blood pressure in postmenopausal women. *Medicine and Science in Sports and Exercise* **33** (2001). <https://doi.org:10.1097/00005768-200111000-00005>
- 5 Cheung, B. M. Y. *et al.* Randomised controlled trial of qigong in the treatment of mild essential hypertension. *Journal of Human Hypertension* **19** (2005). <https://doi.org:10.1038/sj.jhh.1001884>
- 6 Carpes, L., Jacobsen, A., Domingues, L., Jung, N. & Ferrari, R. Recreational beach tennis reduces 24-h blood pressure in adults with hypertension: a randomized crossover trial. *European Journal of Applied Physiology* **121** (2021). <https://doi.org:10.1007/s00421-021-04617-4>
- 7 Wolff, M. *et al.* Impact of a short home-based yoga programme on blood pressure in patients with hypertension: A randomized controlled trial in primary care. *Journal of Human Hypertension* **30** (2016). <https://doi.org:10.1038/jhh.2015.123>
- 8 Sulaeman, R., Purnamawati, D., Wijayanti, I. G. A. P. W. & Muhasidah. How progressive muscle relaxation exercise affects patient with hypertension? *Rawal Medical Journal* **45** (2020). <https://doi.org:10.1097/00004650-200301000-00009>
- 9 Da Nóbrega, T. K. S. *et al.* Walking/running or a recreative soccer game presents similar effectiveness in inducing post-exercise hypotension. *Revista Brasileira de Medicina do Esporte* **19** (2013). <https://doi.org:10.1590/S1517-86922013000100006>
